# Supplementary material for: Chitosan Biosynthesis and Virulence in the Human Fungal Pathogen Cryptococcus gattii
Source: PubMed Central journal article supplement (PMC6796976; doi:10.1128/msphere.00644-19), 2019-10-09
Supplement: mSphere.00644-19-sf001.pdf [file mSphere.00644-19-sf001.pdf]

**Alignment of Cdal sequence (H99) with *C. gatti* (CNBG 1745) Cdal sequence**

```
H99      MFTFAAFSALLISLAGVVAQTTGTSVDSSILTKTADSTGPSGFSIPALSELTSGAPTDST  60
M  FAA SALL+SLAG++AQT  TSV SS+LT+TA  TGPSGFSIPALSELTSGAPTD+T
R265    MSFAAAVSALLVSLAGIMAQTASTSVASSVLTQTA-PTGPSGFSIPALSELTSGAPDST  59

H99      VALYSTFAAGATPTVSGAPVLPTSALTIADYPALDVTPTNSSLVKDWMKIDLSKVPSY  120
VALYSTF A ATPTVSGAPVLPTSALTIA+YPALDV PPTNSSLV+++W+AKID++KVP+Y
R265    VALYSTFPASATPTVSGAPVLPTSALTIANYPALDVIPPTNSSLVQEWLAKIDMTKVPNY  119

H99      NVTGDCSTDAAAISDGRCWWTGGCTRET DIVECPDKNVWGLSYDDGSPFPTLLIDYL  180
N  TTGDCSTD  A SDGRCWWTGGCTR  TDIV CPDKNVWGLSYDDGSPFPTLLIDYL
R265    NATGDCSTDPGATSDGRCWWTGGCTRATDIVACPDKNVWGLSYDDGSPFPTLLIDYL  179

H99      QEKNIKTTFVVGSRVLSRPEMLQTEYMSGHQISIHTWHPALTTLTNEEIVAELGWTMK  240
QEKNIKTTFVVGSRVLSRPEMLQTEYMSGH+ISIHTWHPALTTLTNE+IVAEL  WTMK
R265    QEKNIKTTFVVGSRVLSRPEMLQTEYMSGHEISIHTWHPALTTLTNEQIVAELAWTMK  239

H99      VIKDTLGVTNPNTFRPPYGDIDDRVRAIAAQMGLTPVIWTSYTDGSTTVNFDTNDWHISGG  300
VIKDT+GVTNPNTFRPPYGDIDDRVRAIAAQMGLTPVIWTSY+DGSTTVNFDTNDWHISGG
R265    VIKDTIGVTNPNTFRPPYGDIDDRVRAIAAQMGLTPVIWTSYSDGSTTVNFDTNDWHISGG  299

H99      TATGASSYETF EKILTEYAPKLDTG FITLEHDIYQQSVDLAVGYILPQVLANGTYQLKSI  360
TATGASSYETF EKIL  EYAPKL+TG FITLEHD+YQQSVDLAVGYILPQVLANGTYQLKSI
R265    TATGASSYETF EKILNEYAPKLNTG FITLEHDLYQQSVDLAVGYILPQVLANGTYQLKSI  359

H99      INCLGKDTSEAYIETSSNQTTTQITAATGSQSTFFQPIVGTATGAEV SAPSEATGSTAAG  420
INCLGKD SEAYIETSSNQTTTQIT+A+G  ST+FPQPIVGTATG+EV SAPSEAT  + A
R265    INCLGKDISEAYIETSSNQTTTQITSASG--STYFPQPIVGTATGSEV SAPSEAT-GSTAA  416

H99      SAASTTSGSGASASTGAASNTSSSGSGRSATMGGALIALAAVAVGMVYVA  470
+A+ ++ + + ++  AS+++SSSGSGRSATMGGALIA AAVAVG+VYVA
R265    GSAAGSAATTS GSAASGASDSSSSSGSGRSATMGGALIAFAAVAVGIVYVA  466
```

**400/470 identical (85%); 435/470 positive (92%)**

**Alignment of Cda2 sequence (H99) with *C. gatti* (CNBG 0964) Cda2 sequence**

|      |                                                               |     |
|------|---------------------------------------------------------------|-----|
| H99  | MIPSTAAALLTLTAGAAFAHTGCGGHEIGRRNVGGPMLYRRAVTDEASAAVSTDINTECT  | 60  |
|      | MIPSTAAA LTLTAG AFAH GCGG EIGRRNVGGPML+ RAVTDEASAAVSTD++TECT  |     |
| R265 | MIPSTAAAFLLTLTAGTAFAHIGCGGQEIGRRNVGGPMLHSRAVTDEASAAVSTDVSTECT | 60  |
| H99  | AYSYAPVTELISSFPTIWQTASIPSNDTEAQQLFKGKINSTLNKIPNDVPHGTPTGDWTG  | 120 |
|      | AY YAPVT++ SSFP IWQTASI S D+EAQQLF IN+T+N+K+PNDVPHGTPTG+WTG   |     |
| R265 | AYGYAPVTQIASSFP AIWQTASILSTDSEAQQLFASINATVNSKLPNDVPHGTPTGNWTG | 120 |
| H99  | VNYSNSDPDCWVTHNKCTTPSNDTGLQADISIAPEPMTWGLGFDDGPNC SHNALYDLLLE | 180 |
|      | V+YS+SDPDCWVTHNKCTTPS+DTGL+ADI+ PEPMTWGLGFDDGPNC SHNALYDLLLE  |     |
| R265 | VSYSSSDPDCWVTHNKCTTPSSDTGLKADITTVPEPMTWGLGFDDGPNC SHNALYDLLLE | 180 |
| H99  | NNQKATMFFIGSNVLDWPLQAMRAHDEGHEICVHTWSHQYMTALSNEVVFAELYTQKAI   | 240 |
|      | NNQKATMF+IGSNV+DWPLQAMRAHDEGHEICVHTWSHQYMTALSNEVVFAELYTQKAI   |     |
| R265 | NNQKATMFYIGSNVMDWPLQAMRAHDEGHEICVHTWSHQYMTALSNEVVFAELYTQKAI   | 240 |
| H99  | KAVLGVTPQCWRPPYGDVDNRVRMIAEGLNLTTIIWSDDTDDWAAGTNGVTEQDVTNNYQ  | 300 |
|      | KAVLGVTP CWRPPYGDVDNRVRMIA LNL+TI+WSDDT+DW AGTNGVT+QDVTNNYQ   |     |
| R265 | KAVLGVTPLCWRPPYGDVDNRVRMIAAALNLSTIVWSDDTNDWEAGTNGVTQQDVTNNYQ  | 300 |
| H99  | SVIDKAGNGTYTTHGPPVVLNHELTNYTMSVFMFMPKIKSAFNIVPICTAYNITQPYAE   | 360 |
|      | SVIDKAGNGTYTTHGPPVVLNHELTNYTMSVF++MFPKIKSAF+YIVPICTAYNITQPYAE |     |
| R265 | SVIDKAGNGTYTTHGPPVVLNHELTNYTMSVFMFMPKIKSAFSYIVPICTAYNITQPYAE  | 360 |
| H99  | SNITCPNFETYISGVTNISSSTTQKDGSSSTNTASGSGAAGSASATSSSDSSSSGGSSG   | 420 |
|      | SN+TCPNFETYISGVTNIS+STTQKDGSSSTNT+ + + S SA+S+ +SS            |     |
| R265 | SNVTCPNFETYISGVTNISTSTTQKDGSSSTNTSYTASGSTSPSASSTGKIASS-----   | 414 |
| H99  | SSGSNNASSGALGMFDSLGSVGLILGGVVAGVMML 455                       |     |
|      | A SGALGM+D LSG+GLILGGVVAGVMML                                 |     |
| R265 | -----AKSGALGMYDGLSGMGLILGGVVAGVMML 443                        |     |

**79/455 identical (83%); 414/455 positive (90%)**

**Alignment of Cda3 sequence (H99) with C. gatti (CNBG 0806) Cda3 sequence**

```
H99   MYGHL SLSALS LFAVVA AAPFRESWLQPRDSPVSQLFRRTAPDPNSNDYMSYYPGPGSTP 60
      MYGHL SLSALS L AVVAAAPF ESWLQPRDSPVSQLFRR APDPN++DY+S+YP PGSTP
R265  MYGHL SLSALS L LAVVA AAPFHESWLQPRDSPVSQLFRRAAPDPNASDYLSHYPSPGSTP 60

H99   NVSTIPQAWLDK LATVNLPNVPVATPDGGRPTYPNNEDDGDSTICSFTDQCRVEDDL YSP 120
      NVSTIPQAWLDK LATV LPNV VAT G PTYPNNE+DGDSTICSFTDQC DDL+SP
R265  NVSTIPQAWLDK LATVQLPNVSVATASGEIPTYPNNENDGDSTICSFTDQCV EPDDL FSP 120

H99   PGEKIWALS FDDGPTDVSPALYDYLAQNNISSATHFMIGGNVITSPQSVLVAVKAGGHL 180
      PGEKIWALS FDDGPTDVSP LYD+LAQNNISS ATHFMIGGNV+TSPQSVL+AV+AGGHL
R265  PGEKIWALS FDDGPTDVSPGLYDFLAQNNISSKATHFMIGGNVVTSPQSVLIAVQAGGHL 180

H99   AVHTW SHPYMTTLTNEQVVGELGWTMQALS DLNGGRIPMYWRPPYGDVDNRVRAIAKEVF 240
      AVHTW SHPYMTTLTNEQVVGELGWTMQALS DLNGGR+P +WRPPYGDVDNRVRAIAK VF
R265  AVHTW SHPYMTTLTNEQVVGELGWTMQALS DLNGGRV PKFWRPPYGDVDNRVRAIAKGVF 240

H99   GLVTVLWSDTNDWAI TDEPGQYSVASVEAYFDTLVTGNRTQGLL LLEHELDNNTVEVFE 300
      L TVLWD DTNDWAI DEP QYS+ASVEAYFDTLVTGNRTQGLL LLEHELDNNTV VFE
R265  DLETVLWDEDTNDWAI ADEPSQYSIASVEAYFDTLVTGNRTQGLL LLEHELDNNTVTVFE 300

H99   TEYPKAVGNGWTVKNVADAFNMEWYLN SGKGNNDVVTMSVAGTLTTATPTNTSTYVASS 360
      TEYPKA+ NGW VKNVADAFNMEWYLN SGKGN+ VTTMSV GTL TA PTNTST VAS+
R265  TEYPKAIANGWIVKNVADAFNMEWYLN SGKGN DATVVTMSVGGTLPTAAPTNTSTSVASA 360

H99   TAASSASV TDSAGVSIASAASSEASSSWAIA NRPSHFVIAIACGLALAAIMV 412
      +A SS SVTDSAGVSIASAASSE+SSSWAIA RPS F+ IACGL AA +V
R265  SATSSGSV TDSAGVSIASAASSESSSSWAIA ERPSLFI--IACGLVFAAAVV 410
```

**352/412 identical (85%); 372/412 positive (90%)**
