# Supplementary material for: Chitosan Biosynthesis and Virulence in the Human Fungal Pathogen Cryptococcus gattii
Source: PubMed Central journal article supplement (PMC6796976; doi:10.1128/msphere.00644-19), 2019-10-09

# S. Fig. 5

## A

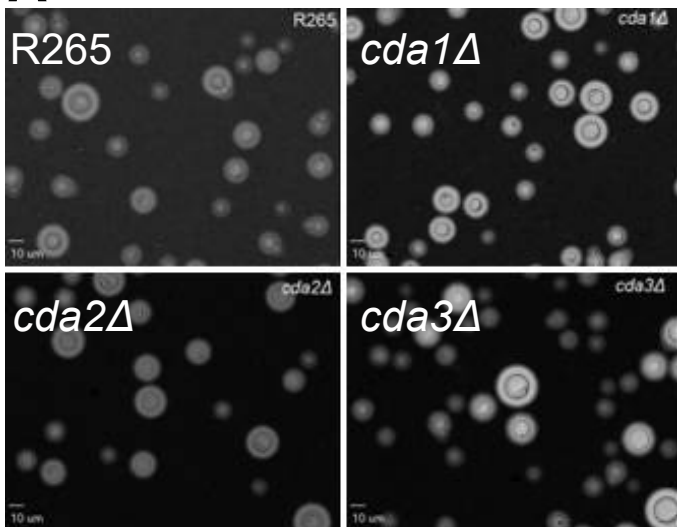

## B

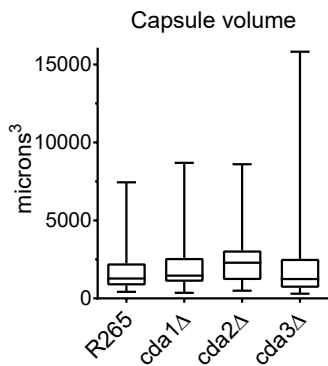

## C

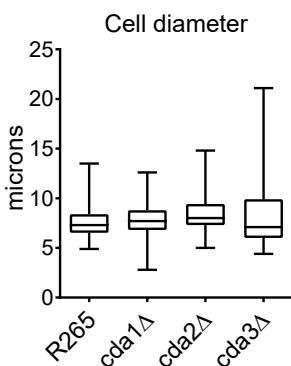

Supplement: mSphere.00644-19-sf005.pdf [file mSphere.00644-19-sf005.pdf]
