# Supplementary material for: Chitosan Biosynthesis and Virulence in the Human Fungal Pathogen Cryptococcus gattii
Source: PubMed Central journal article supplement (PMC6796976; doi:10.1128/msphere.00644-19), 2019-10-09
Supplement: mSphere.00644-19-st001.pdf [file mSphere.00644-19-st001.pdf]

## S. Table 1

| Primer name    | sequence                                   |
|----------------|--------------------------------------------|
| 1-Cda1 (R265)  | CGTTTGACTGCGGACTTAG                        |
| 2-Cda1 (R265)  | AGTTCCAACCGAAGACAGG                        |
| 3-Cda1 (R265)  | ACGGTCGCTTTTTAGACGCcaggaaacagctatgaccatg   |
| 4-Cda1 (R265)  | catggtcatagctgtttcctgGCGTCTAAAAAGCGACCGT   |
| 5-Cda1 (R265)  | cactggccgtcgttttacaacAGGGCTTTCATTGTAGCG    |
| 6-Cda1 (R265)  | CGCTACAATGAAAGCCCTgttgtaaacgacggccagtg     |
| 7-Cda1 (R265)  | GGAAGGAATCATTGTTTCGTTTCG                   |
| 8-Cda1 (R265)  | ACAGTCATCAAAGGTTTCGG                       |
| 9-Cda1 (R265)  | TGAGCTCGCTCAAAGCGCTAG                      |
| 10-Cda1 (R265) | TGCTGTTGCTGTTGGTATAGTA                     |
|                |                                            |
| 1-Cda2 (R265)  | AGTAGTCGGTCAATAATGCG                       |
| 2-Cda2 (R265)  | GGGTTCCAAGACTGATAAGC                       |
| 3-Cda2 (R265)  | CGTTTTACCTTTTCCGCTCcaggaaacagctatgaccatg   |
| 4-Cda2 (R265)  | catggtcatagctgtttcctgGAGCGGAAAAGGTAAAACG   |
| 5-Cda2 (R265)  | cactggccgtcgttttacaacGCATACAACATCACCCAACC  |
| 6-Cda2 (R265)  | GGTTGGGTGATGTTGTATGCgttgtaaacgacggccagtg   |
| 7-Cda2 (R265)  | AAATACTAACC GCACTCGC                       |
| 8-Cda2 (R265)  | TATTATCACCCAGCAGTCCTCCCG                   |
| 9-Cda2 (R265)  | TTCGCCTGCGTGATTAAGAG                       |
| 10-Cda2 (R265) | GTGTTTTCGTGTGATGTTCC                       |
|                |                                            |
| 1-Cda3 (R265)  | CGTTCTGTGCCAAAACC                          |
| 2-Cda3 (R265)  | TGCTGATGCTCTACGAGTGC                       |
| 3-Cda3 (R265)  | CCAGGACTGATTTACTGTCAcaggaaacagctatgaccatg  |
| 4-Cda3 (R265)  | catggtcatagctgtttcctgTGACAGTGTAATCAGTCCTGG |
| 5-Cda3 (R265)  | cactggccgtcgttttacaacGAATCATCTTCTTCGTGGG   |
| 6-Cda3 (R265)  | CCCACGAAGAAGATGATTCgttgtaaacgacggccagtg    |
| 7-Cda3 (R265)  | TCCCGAAAGTCAGAAGGTC                        |
| 8-Cda3 (R265)  | CGTCAGCAAATGATAGGTG                        |
| 9-Cda3 (R265)  | GACCGTACATTTAATAGGC                        |
| 10-Cda3 (R265) | CCGCCCCAACCAATACTTCT                       |
